# Supplementary material for: Pathological responses after angiogenesis or EGFR inhibitors in metastatic colorectal cancer depend on the chemotherapy backbone
Source: PubMed Central journal article supplement — Br J Cancer. 2015 Oct 13;113(9):1298–304. doi: 10.1038/bjc.2015.321 (PMC4815793; doi:10.1038/bjc.2015.321), 2015-10-13
Supplement: bjc2015321x1.pdf [file bjc2015321x1.pdf]

No preoperative  
treatment  
 $N = 32$

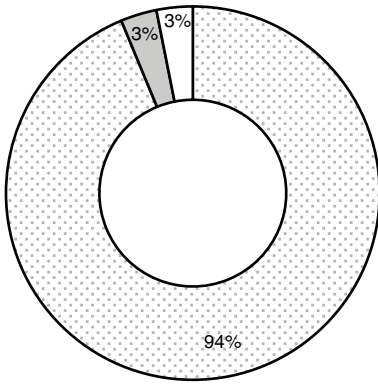

Pathological responses

-  No response
-  Minor response
-  Major response
-  Non evaluable
